# Supplementary material for: Assembling metals (CoIIand MnII) with pyridylcarboxylates in the presence of azide: synthesis, structural aspects and magnetic behavior of three coordination polymers
Source: Royal Society of Chemistry journal article supplement (doi:10.1039/b715460g), 2007-12-04
Supplement: b715460g.pdf [file b715460g.pdf]

## Supporting Information

**Assembling metals (Co<sup>II</sup> and Mn<sup>II</sup>) with pyridylcarboxylates in presence of azide: synthesis, structural aspects and magnetic behavior of three coordination polymers**

Kartik Chandra Mondal, Oindrila Sengupta, Munirathinam Nethaji, and Partha Sarathi Mukherjee\*

*Department of Inorganic and Physical Chemistry, Indian Institute of Science, Bangalore-560012, India. Fax: 91-80-23601552; Tel: 91-80-2293-3352*

*E-mail: psm@ipc.iisc.ernet.in*

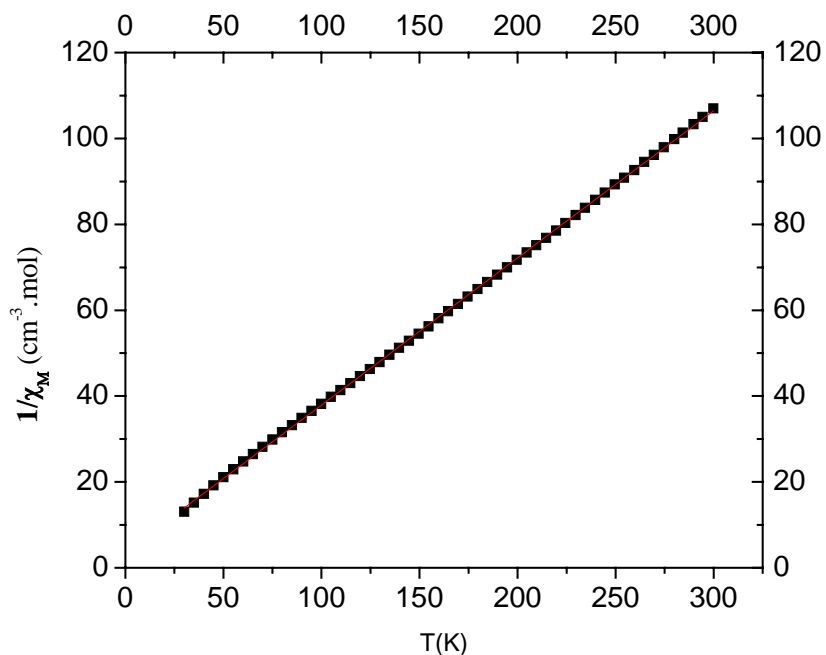

**Figure-S1:** Plot of  $\chi_M^{-1}$  versus T data for **1** between 300-30 K. Red line represents the fitting using Curie-Weiss equation.

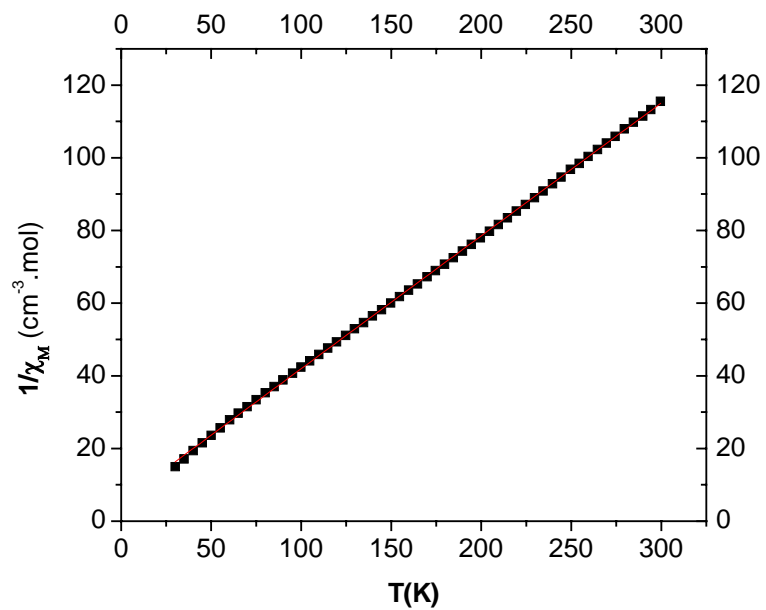

**Figure-S2:** Plot of  $\chi_M^{-1}$  versus  $T$  data for **2** between 300-30 K. Red lines represent the fitting using Curie-Weiss equation.

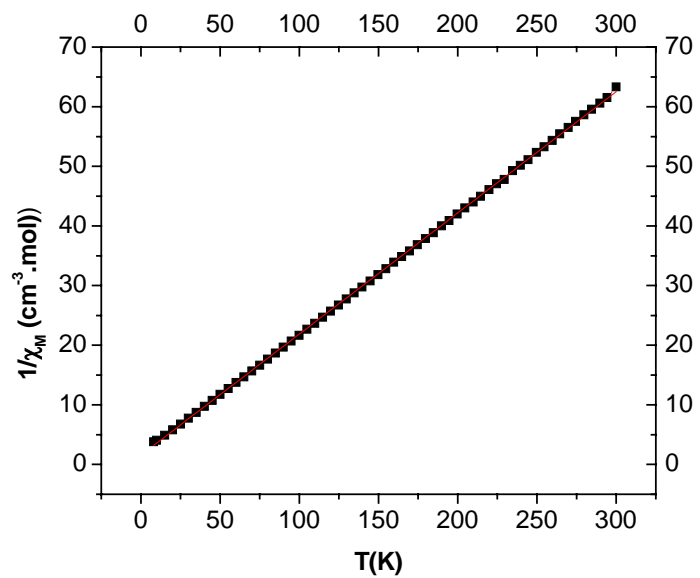

**Figure-S3:** Plot of  $\chi_M^{-1}$  versus  $T$  data for **3** between 300-8 K. Red lines represent the fitting using Curie-Weiss equation.

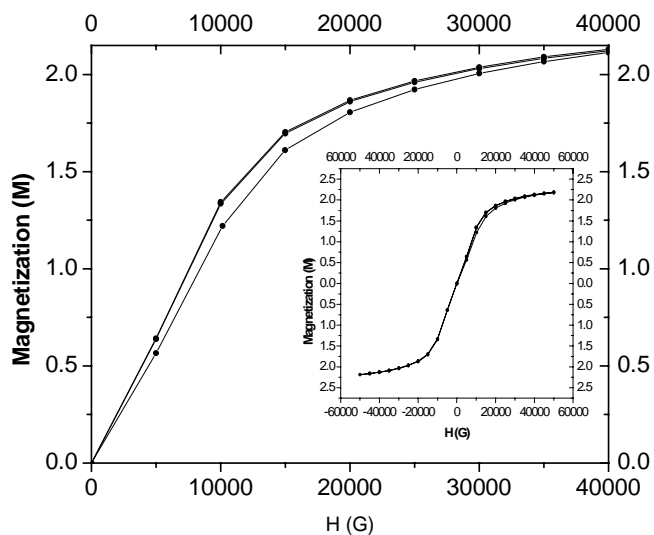

**Figure-S4.** Plot of M vs. H (upper portion) and full range M vs. H (inset) for **1**.

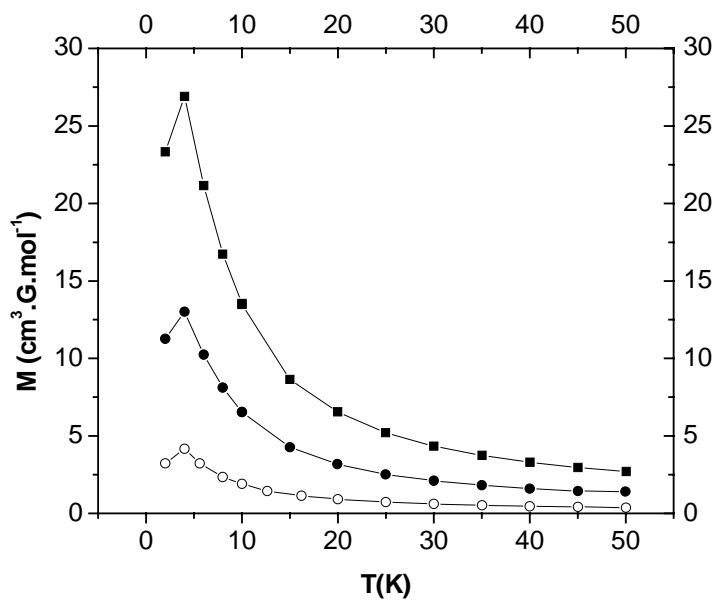

**Figure-S5.** Plot of M vs T at 10 G (open circle), 30 G (filled circle) and 60 G (square) for

**1.**
